# Supplementary material for: The Influence of the Magnetic Field on Ni Thin Film Preparation by Electrodeposition Method and Its Electrocatalytic Activity towards Hydrogen Evolution Reaction
Source: MDPI journal article supplement (doi:10.3390/coatings13101816), 2023-10-23
Supplement: s1 [file s1]

**Table S1- Values of overpotential values for HER of fabricated Ni electrodes from acetate bath at pH 1.47 and deposition potential -1.3 V**

| pH 1.47, pot -1.3 V | $\eta_{10}$ (mV) | Tafel slope (mV.dec <sup>-1</sup> ) | Contact angle |
|---------------------|------------------|-------------------------------------|---------------|
| Without B           | 323              | 160                                 | 116.19        |
| B <sub>L</sub>      | 379              | 280                                 | 114.37        |
| B <sub>II</sub>     | 280              | 108                                 | 117.36        |

**Table S2- Values of overpotential values for HER of fabricated Ni electrodes from acetate bath at pH 2.5 and deposition potential -1.4 V**

| pH 2.5, pot -1.4 V | $\eta_{10}$ (mV) | Tafel slope (mV.dec <sup>-1</sup> ) | Contact angle |
|--------------------|------------------|-------------------------------------|---------------|
| Without B          | 316              | 149                                 | 115.69        |
| B <sub>L</sub>     | 291              | 102                                 | 117.38        |
| B <sub>II</sub>    | 298              | 132                                 | 116.84        |

**Table S3- Values of overpotential values for HER of fabricated Ni electrodes from acetate bath at pH 4.4 and deposition potential -1.1 V**

| pH 4.4, pot -1.1 V | $\eta_{10}$ (mV) | Tafel slope (mV.dec <sup>-1</sup> ) | Contact angle |
|--------------------|------------------|-------------------------------------|---------------|
| Without B          | 330              | 133                                 | 119.01        |
| B <sub>L</sub>     | 353              | 228                                 | 115.39        |
| B <sub>II</sub>    | 330              | 192                                 | 116.47        |

**Table S4- Values of overpotential values for HER of fabricated Ni electrodes from acetate bath at pH 4.4 and deposition potential -1.2 V**

| pH 4,4, pot -1.2 V | $\eta_{10}$ (mV) | Tafel slope (mV.dec <sup>-1</sup> ) | Contact angle |
|--------------------|------------------|-------------------------------------|---------------|
| Without B          | 367              | 252                                 | 116.46        |
| B <sub>L</sub>     | 335              | 148                                 | 113.57        |
| B <sub>II</sub>    | 325              | 98                                  | 115.43        |

**Table S5- Values of overpotential values for HER of fabricated Ni electrodes from borate bath at pH 1.47 and deposition potential -1.1 V**

| pH 1.47, pot -1.1 V | $\eta_{10}$ (mV) | Tafel slope (mV.dec <sup>-1</sup> ) | Contact angle |
|---------------------|------------------|-------------------------------------|---------------|
| Without B           | 391              | 226                                 | 114.18        |
| B <sub>L</sub>      | 384              | 208                                 | 115.52        |
| B <sub>II</sub>     | 380              | 182                                 | 116.34        |

**Table S6- Values of overpotential values for HER of fabricated Ni electrodes from borate bath at pH 1.47 and deposition potential -1.2 V**

| pH 1.47, pot -1.2 V | $\eta_{10}$ (mV) | Tafel slope (mV.dec <sup>-1</sup> ) | Contact angle |
|---------------------|------------------|-------------------------------------|---------------|
| Without B           | 369              | 206                                 | 115.77        |
| B <sub>L</sub>      | 373              | 203                                 | 113.81        |
| B <sub>II</sub>     | 367              | 160                                 | 116.9         |

**Table S7- Values of overpotential values for HER of fabricated Ni electrodes from borate bath at pH 2.5 and deposition potential -1.2 V**

| pH 2.5, pot -1.2 V | $\eta_{10}$ (mV) | Tafel slope (mV.dec <sup>-1</sup> ) | Contact angle |
|--------------------|------------------|-------------------------------------|---------------|
| Without B          | 319              | 155                                 | 116.85        |
| B <sub>L</sub>     | 342              | 147                                 | 115.39        |
| B <sub>II</sub>    | 354              | 178                                 | 111.06        |

| Table S8- Values of overpotential values for HER of fabricated Ni electrodes from borate bath at pH 3.7 and deposition potential -1.2 V |                  |                                     |               |
|-----------------------------------------------------------------------------------------------------------------------------------------|------------------|-------------------------------------|---------------|
| pH 3.7, pot -1.2 V                                                                                                                      | $\eta_{10}$ (mV) | Tafel slope (mV.dec <sup>-1</sup> ) | Contact angle |
| Without B                                                                                                                               | 358              | 199                                 | 117.17        |
| B <sub>I</sub>                                                                                                                          | 360              | 180                                 | 112.95        |
| B <sub>II</sub>                                                                                                                         | 373              | 180                                 | 112.71        |

| Table S9- Values of overpotential values for HER of fabricated Ni electrodes from citrate bath at pH 1.47 and deposition potential -1.2 V |                  |                                     |               |
|-------------------------------------------------------------------------------------------------------------------------------------------|------------------|-------------------------------------|---------------|
| pH 1.47, pot -1.2 V                                                                                                                       | $\eta_{10}$ (mV) | Tafel slope (mV.dec <sup>-1</sup> ) | Contact angle |
| Without B                                                                                                                                 | 262              | 121                                 | 110.64        |
| B <sub>I</sub>                                                                                                                            | 231              | 118                                 | 118.46        |
| B <sub>II</sub>                                                                                                                           | 245              | 123                                 | 114.13        |

| Table S10- Values of overpotential values for HER of fabricated Ni electrodes from citrate bath at pH 2.5 and deposition potential -1.2 V |                  |                                     |               |
|-------------------------------------------------------------------------------------------------------------------------------------------|------------------|-------------------------------------|---------------|
| pH 2.5, pot -1.2 V                                                                                                                        | $\eta_{10}$ (mV) | Tafel slope (mV.dec <sup>-1</sup> ) | Contact angle |
| Without B                                                                                                                                 | 245              | 104                                 | 117.79        |
| B <sub>I</sub>                                                                                                                            | 277              | 115                                 | 116.61        |
| B <sub>II</sub>                                                                                                                           | 279              | 104                                 | 107.43        |

| Table S11- Values of overpotential values for HER of fabricated Ni electrodes from citrate bath at pH 3.7 and deposition potential -1.2 V |                  |                                     |               |
|-------------------------------------------------------------------------------------------------------------------------------------------|------------------|-------------------------------------|---------------|
| pH 3.7, pot -1.2 V                                                                                                                        | $\eta_{10}$ (mV) | Tafel slope (mV.dec <sup>-1</sup> ) | Contact angle |
| Without B                                                                                                                                 | 345              | 145                                 | 111.82        |
| B <sub>I</sub>                                                                                                                            | 304              | 122                                 | 115.05        |
| B <sub>II</sub>                                                                                                                           | 365              | 139                                 | 113.68        |

| Table S12- Values of overpotential values for HER of fabricated Ni electrodes from citrate bath at pH 4.4 and deposition potential -1.2 V |                  |                                     |               |
|-------------------------------------------------------------------------------------------------------------------------------------------|------------------|-------------------------------------|---------------|
| pH 4.4, pot -1.2 V                                                                                                                        | $\eta_{10}$ (mV) | Tafel slope (mV.dec <sup>-1</sup> ) | Contact angle |
| Without B                                                                                                                                 | 316              | 117                                 | 109.21        |
| B <sub>I</sub>                                                                                                                            | 354              | 150                                 | 112.28        |
| B <sub>II</sub>                                                                                                                           | 294              | 106                                 | 115.70        |
